# Supplementary material
Source: PubMed Central journal article supplement (PMC2840183)
Supplement: NIHMS171776-supplement-1.pdf [file NIHMS171776-supplement-1.pdf]

## Supplementary Materials

### Supplementary Methods

#### DNA plasmids

For the mCherry-conjugated MT1-MMP construct, the cDNA encoding MT1-MMP was first amplified by PCR with a sense primer containing a *HindIII* site, and a reverse primer containing a gene sequence encoding GGS as a linker and an *EcoRI* site. The PCR product of cDNA encoding mCherry was then fused to the C-terminus of the MT1-MMP-GGS fragment before this whole piece of recombinant gene product was cloned into pcDNA3.1 with *HindIII/XhoI* sites. The GFP-fused Src construct is a gift from Margaret C. Frame at the Beatson Institute for Cancer Research (1).

#### Expression, purification and refolding of the MT1-MMP's catalytic domain

The cDNA sequence encoding for the peptide sequence of the catalytic domain of MT1-MMP (MT1-CAT) was expressed in the pET21 plasmid. The resulting recombinant plasmid was used to transform *E. coli* BL21 (DE3) Codon Plus cells (Stratagene, San Diego, CA). The expression of the MT1-CAT construct was induced for 6 h at 37°C using 1 mM isopropyl  $\beta$ -D-thiogalactoside. The cells were collected by centrifugation and disrupted by sonication on ice in 10 mM Tris-HCl buffer, pH 8.0, containing 1 M NaCl, 1 mM phenylmethylsulfonyl fluoride and lysozyme (5 mg/ml). The inclusion bodies were collected by centrifugation (15,000xg; 20 min). The pellet (10 mg total protein) was washed three times using 10 mM Tris-HCl, pH 8.0, containing 1 M NaCl and 1% Triton X-100. The resulting pellet was dissolved in 10 mM Tris-HCl, pH 8.0,

containing 6 M guanidine hydrochloride and 10 mM 2-mercaptoethanol. The soluble sample was refolded using a 100-fold dilution in 100 mM Tris-HCl, pH 8.0, supplemented with 1 mM CaCl<sub>2</sub>, 10 μM ZnCl<sub>2</sub>, 500 mM L-arginine monohydrochloride and 20% glycerol. The refolded MT1-CAT was concentrated using a 10 kDa-cutoff concentrator (Millipore, Billerica, MA) and dialyzed against 50 mM HEPES, pH 7.5, containing 1 mM CaCl<sub>2</sub>, 10 μM ZnCl<sub>2</sub> and 0.005% Brij35.

### **The measurement of cleavage efficiency**

The cleaved substrate proteins of MT1-MMP were subjected to 10% SDS-PAGE gels followed by Coomassie Blue staining. After de-staining with 50% (v/v) methanol in water with 10% acetic acid, the cleaved or intact fragments of biosensor proteins were visualized on the gel and recorded by a digital camera (Olympus). GM6001 (5 μM), where indicated, was added to inhibit MT1-MMP activity.

### **Expression and purification of Golli-MBP J37**

The construction of the pET22B-J37 plasmid expressing Golli-MBP-J37 (MBP-J37; GenBank #AAA37720) was reported earlier (2, 3). The MBP-J37 construct was C-terminally tagged with a 6xHis tag. *E. coli* BL21 (DE3)-Codon Plus cells were transformed using the plasmid. The expression of the MBP-J37 construct was induced by 1 mM isopropyl β-D-thiogalactoside for 6 h at 37°C. The MBP-J37 protein was isolated from the soluble fraction of *E. coli* cells on a HiTrap Co<sup>2+</sup>-chelating Sepharose FastFlow column. The MBP-J37 protein was eluted using a 0-500 mM gradient of imidazole concentrations. The peak fractions were combined and concentrated using a 5 kDa cut-off concentrator (Millipore), and dialyzed against 10 mM Tris-HCl, pH 8.0, containing 200 mM NaCl.

## References:

1. Sandilands, E, Cans, C, Fincham, VJ, et al. RhoB and actin polymerization coordinate Src activation with endosome-mediated delivery to the membrane. *Dev Cell* 2004; 7:855-69.
2. Feng, JM, Fernandes, AO, Campagnoni, CW, Hu, YH, and Campagnoni, AT The golli-myelin basic protein negatively regulates signal transduction in T lymphocytes. *J Neuroimmunol* 2004; 152:57-66.
3. Shiryayev, SA, Savinov, AY, Cieplak, P, et al. Matrix metalloproteinase proteolysis of the myelin basic protein isoforms is a source of immunogenic peptides in autoimmune multiple sclerosis. *PLoS One* 2009; 4:e4952.

## Legends for Supplementary Figures, Table, and Movies

**Supplementary Figure 1.** (A) The protein solutions of the CFP/YFP-based Src biosensor (left) and mOrange2/mCherry-based MT1-MMP biosensor (right). (B) The PAGE gel showing the sizes of mOrange2/mCherry-based MT1-MMP biosensor with or without the incubation of MT1-CAT for 8 hrs.

**Supplementary Figure 2.** The fluorescence intensity images of mOrange2 and mCherry with the mOrange2 excitation in HeLa cells transfected with the mOrange2/mCherry-based MT1-MMP biosensor. The scar bar represents the length of 30  $\mu\text{m}$ .

**Supplementary Figure 3.** MT1-MMP fused with mCherry and Src fused with EGFP were co-transfected into HeLa cells which were subsequently stimulated by EGF. The images of MT1-MMP-mCherry and Src-EGFP were displayed and overlaid to demonstrate their co-localization at the cell periphery upon EGF stimulation. The scar bar represents the length of 30  $\mu\text{m}$ .

**Supplementary Figure 4.** *In vitro* characterization of the ‘AHLR’ MT1-MMP biosensor.

(A) Emission spectra of the ‘AHLR’ MT1-MMP biosensor. (excited at 437 nm) before and after incubation with the catalytic domain of MT1-MMP (CAT) for various periods of time as indicated. The broken lines highlight the regions encompassing emission maxima of ECFP (blue) and YPet (yellow). (B) PAGE gel showing the sizes of ‘AHLR’ MT1-MMP biosensor with or without the incubation of CAT after 2 hrs.

**Supplementary Table 1.** The parameters of dichroic mirrors, excitation and emission filters for FRET and different fluorescence proteins.

**Movie 1:** EGF-induced FRET response in HeLa cells expressing MT1-MMP and the mOrange2/mCherry-based MT1-MMP biosensor.

**Movie 2:** EGF-induced FRET response in HeLa cells expressing the mOrange2/mCherry-based KRas-Src biosensor.

**Movie 3:** EGF-induced FRET response of both ECFP/Citrine-based KRas-Src biosensor (left) and mOrange2/mCherry-based MT1-MMP biosensor (right) in a single live HeLa cell.

**Movie 4:** The inhibition of Src by PP1 blocked the EGF-induced FRET response of both ECFP/Citrine-based KRas-Src biosensor (left) and mOrange2/mCherry-based MT1-MMP biosensor (right) in a single live HeLa cell.

**A**

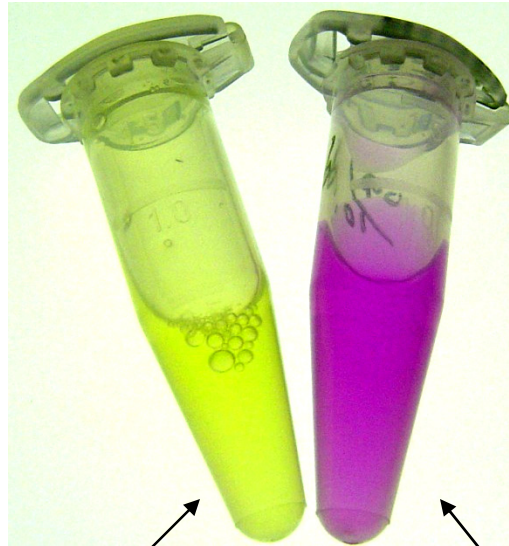

**Purified Src Biosensor  
(ECFP/Citrine)**

**Purified MT1-MMP Biosensor  
(mOrange2/mCherry)**

**B**

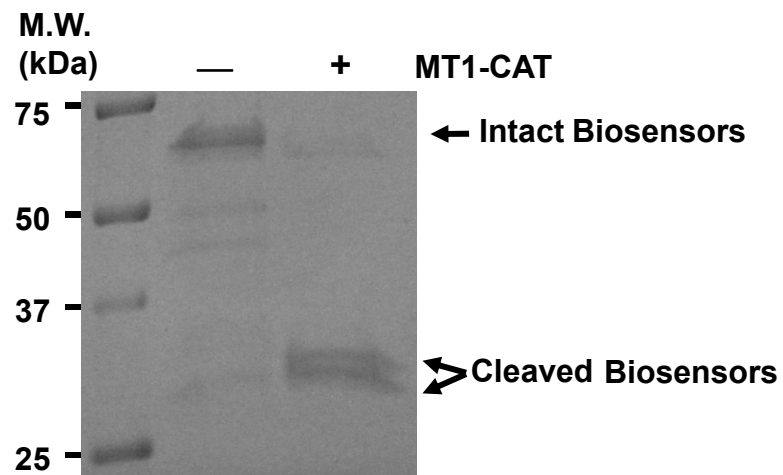

**MT1-MMP biosensor**

**mOrange2**

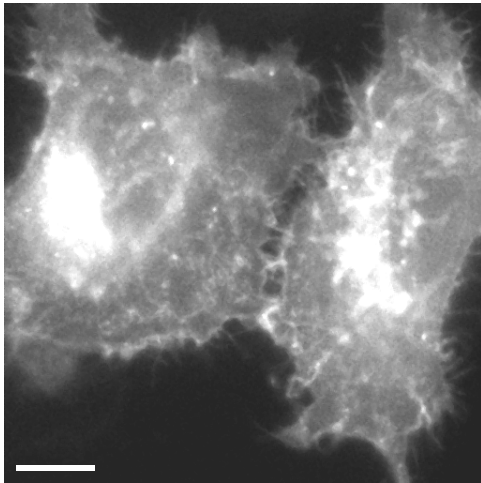

**mCherry**

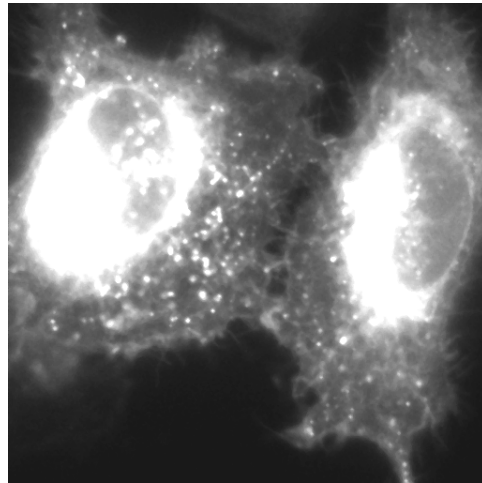

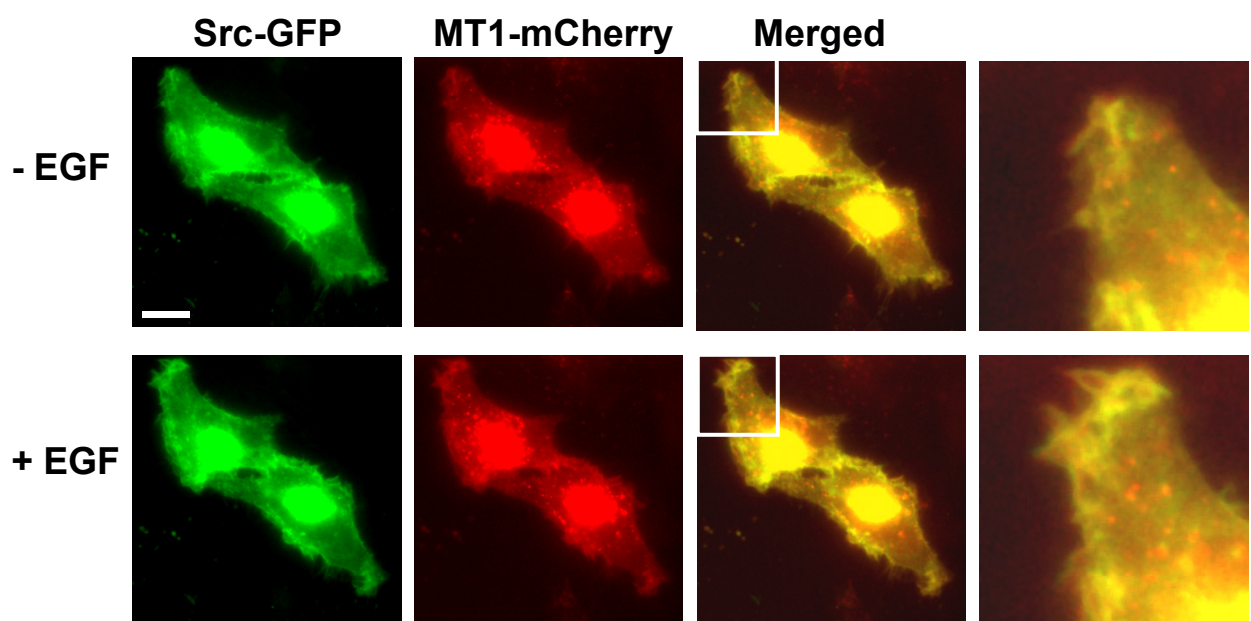

Supplementary Figure 3

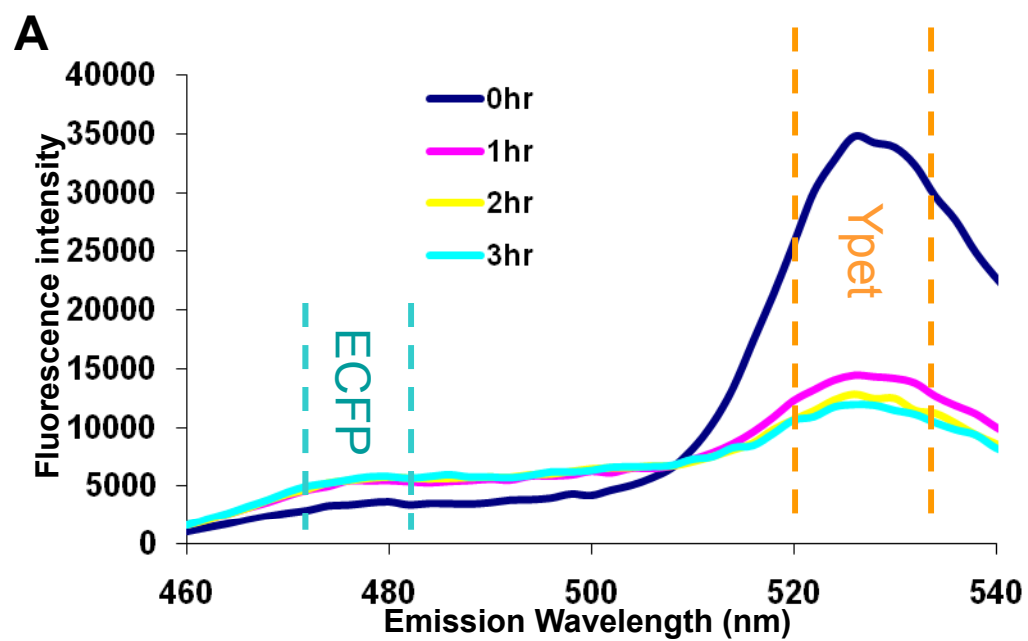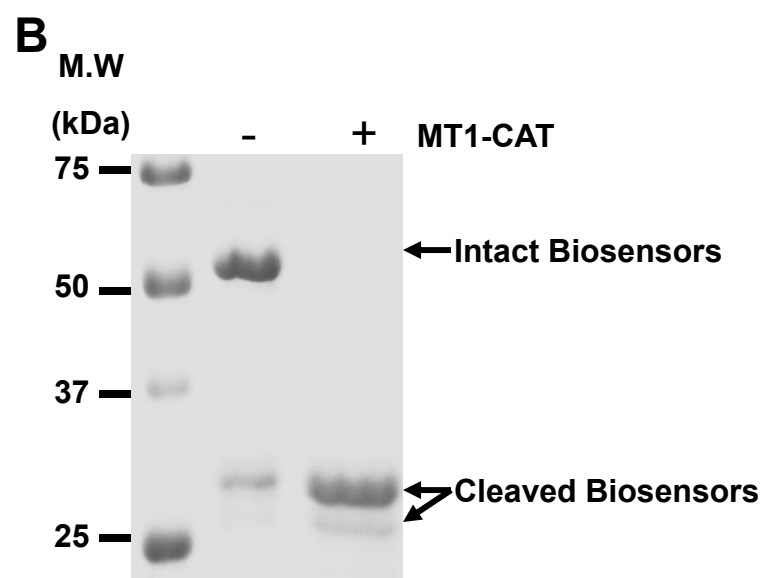

Supplementary Figure 4

**Supplementary Table 1. The settings of filters for fluorescence imaging**

|                       | <b>Excitation<br/>Filters (nm)</b> | <b>Dichroic Mirrors<br/>(long pass; nm)</b> | <b>Emission<br/>Filters (nm)</b> |
|-----------------------|------------------------------------|---------------------------------------------|----------------------------------|
| <b>CFP</b>            | <b>420/20</b>                      | <b>450</b>                                  | <b>475/40</b>                    |
| <b>YFP (FRET)</b>     |                                    |                                             | <b>535/25</b>                    |
| <b>mOrange2</b>       | <b>548/20</b>                      | <b>560</b>                                  | <b>572/20</b>                    |
| <b>mCherry (FRET)</b> |                                    |                                             | <b>630/20</b>                    |
| <b>GFP</b>            | <b>495/10</b>                      | <b>515</b>                                  | <b>535/25</b>                    |
| <b>mCherry</b>        | <b>560/40</b>                      | <b>595</b>                                  | <b>653/95</b>                    |
